# Supplementary material for: Role of the cAMP-PKA-NF-κB pathway in Mucin1 over-expression in A549 cells during Respiratory syncytial virus infection
Source: Springer Nature journal article supplement (doi:10.1186/s12879-023-08837-1), 2023-11-30

Figure2B

MUC1

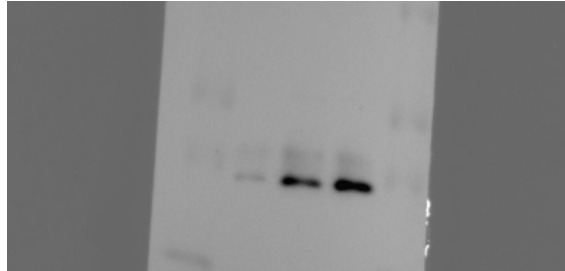

$\beta$ -tublin

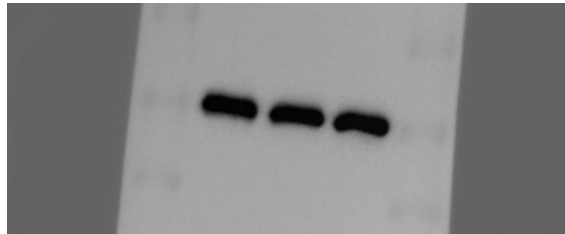

Figure 2E

MUC1

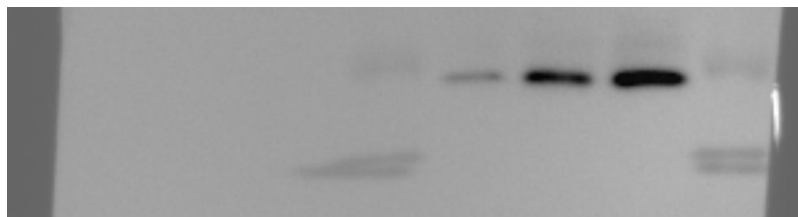

$\beta$ -tubulin

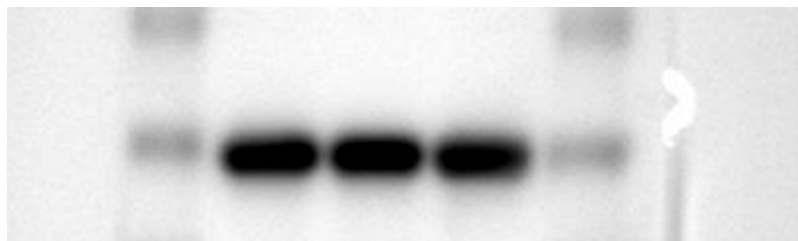

Figure3A

NF- $\kappa$ B

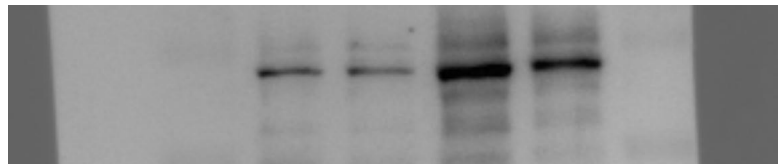

Histon-H3

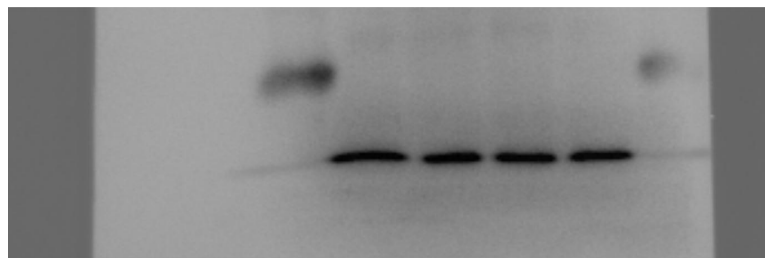

Figure3C

MUC1

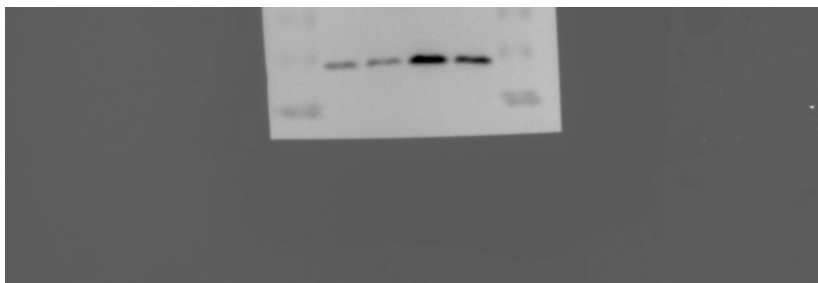

$\beta$ -tublin

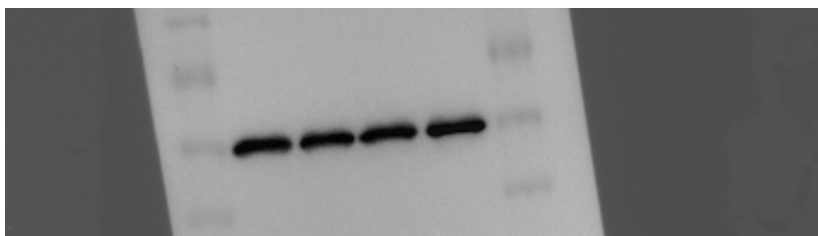

Figure3D

NF- $\kappa$ B

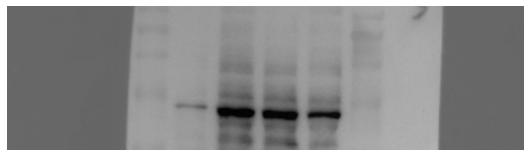

Histon-H3

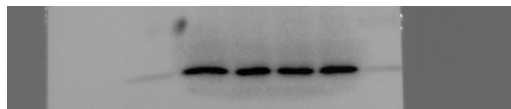

Figure3F

MUC1

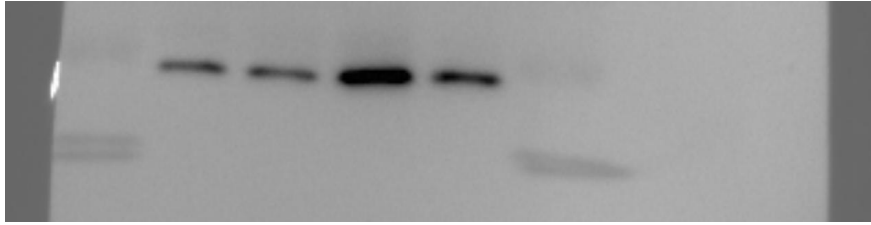

$\beta$ -tublin

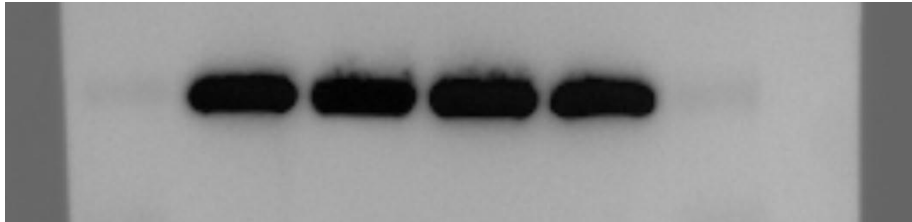

Figure4A

p-IKB $\alpha$

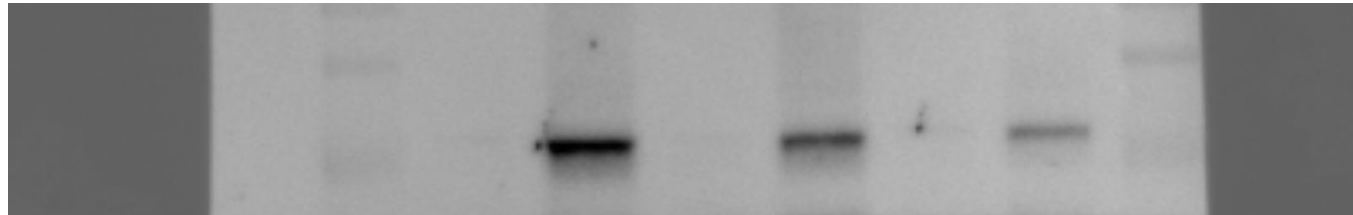

IKB $\alpha$

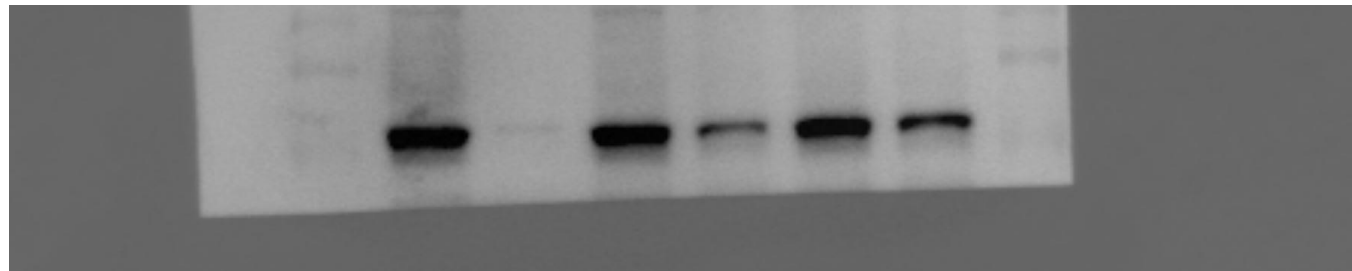

$\beta$ -tublin

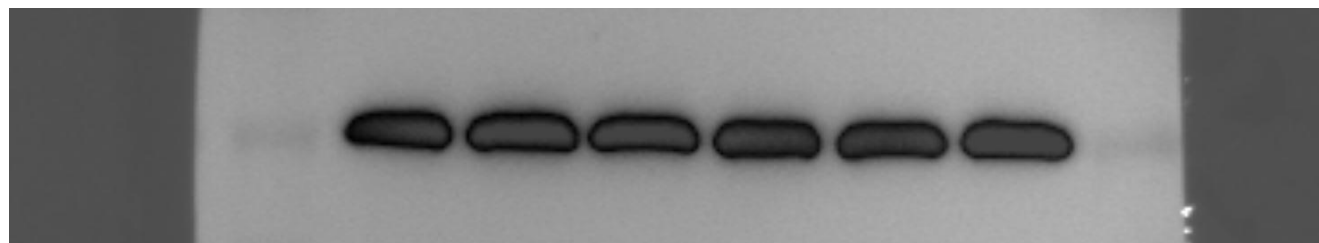

Figure4B

MUC1

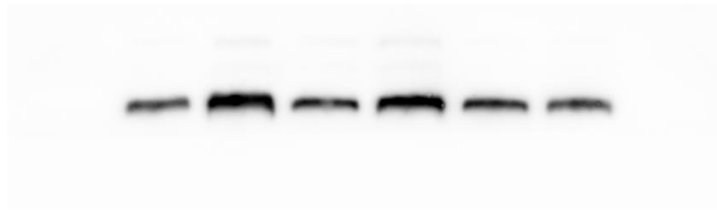

$\beta$ -tublin

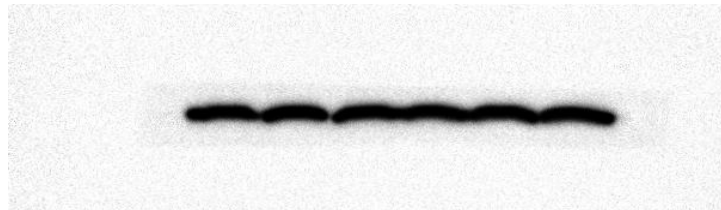



Figure4C

p-IKB $\alpha$

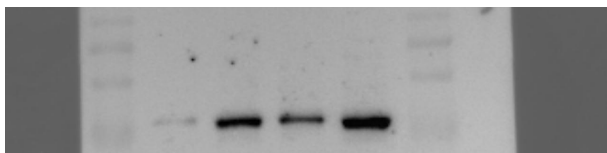

IKB $\alpha$

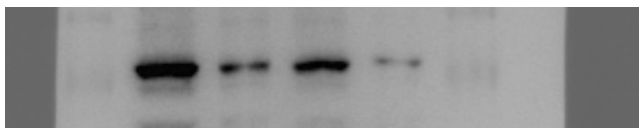

$\beta$ -tublin

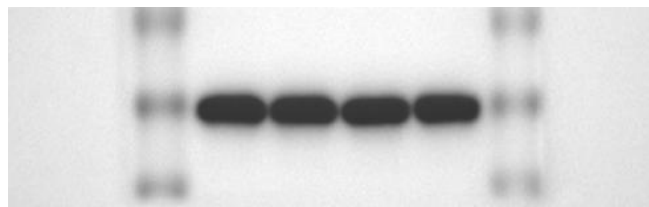

Figure4D

MUC1

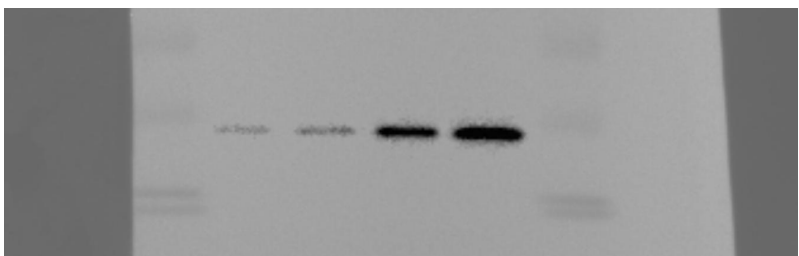

$\beta$ -tublin

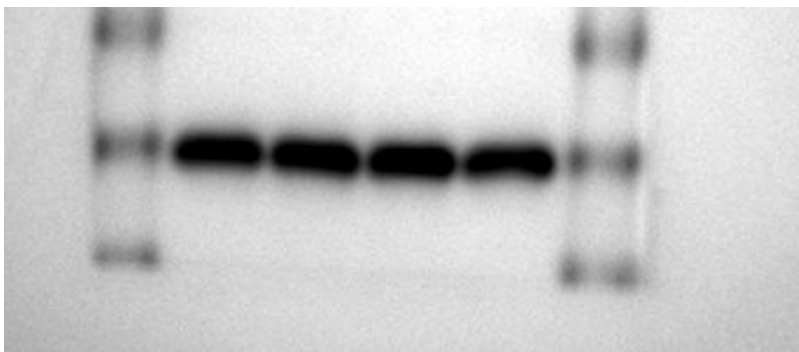

Figure4F

p-IKB $\alpha$

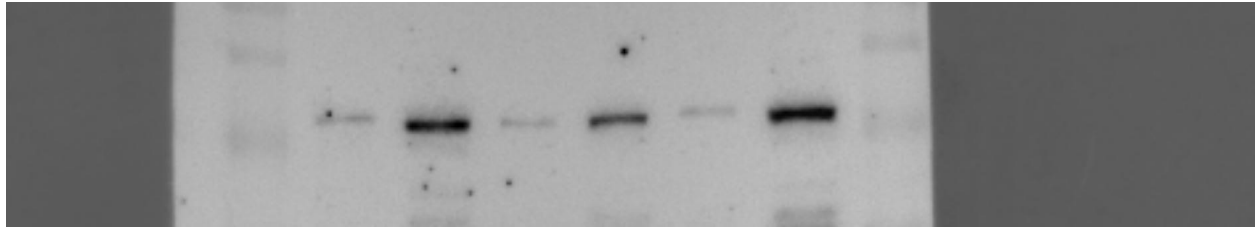

IKB $\alpha$

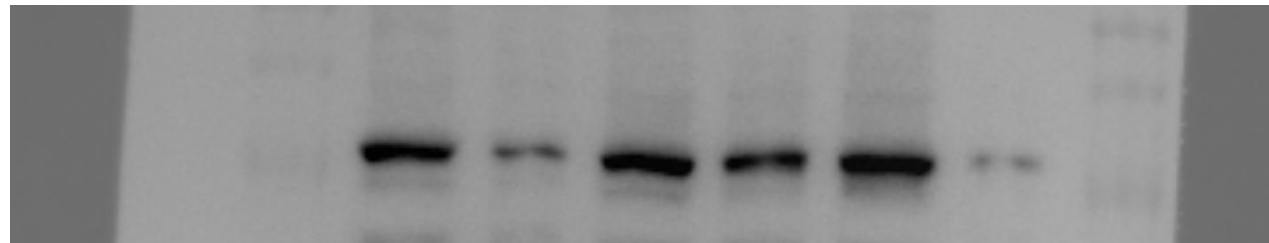

$\beta$ -tublin

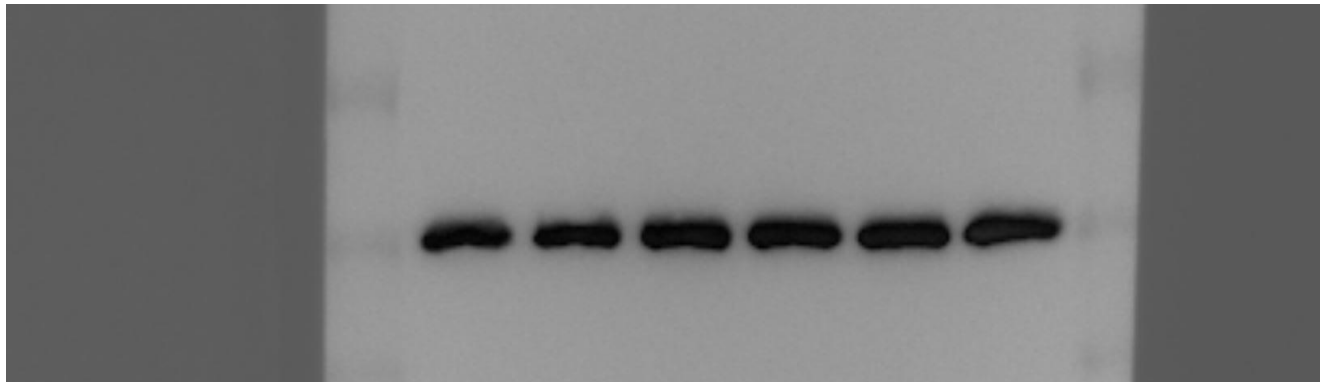

Figure4G

MUC1

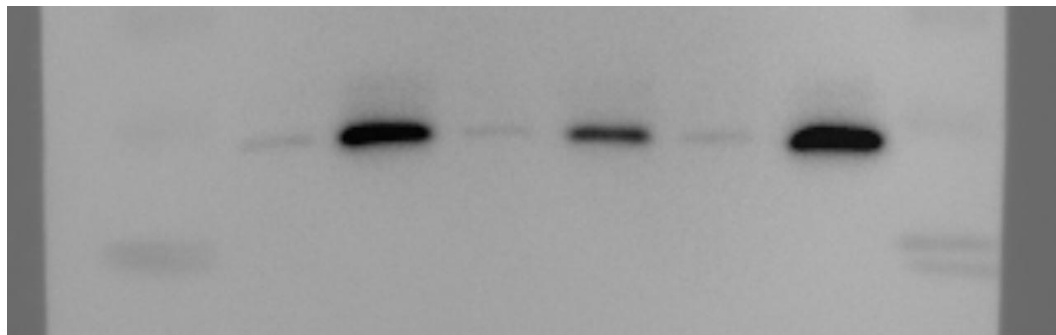

$\beta$ -tublin

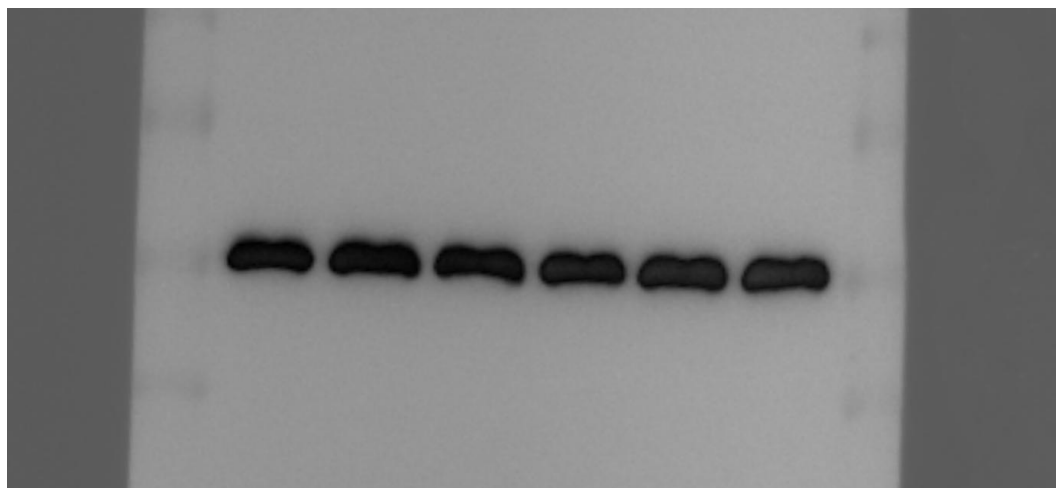

Supplement: MOESM2 [file 26474166]
